# Supplementary material
Source: PubMed Central journal article supplement (PMC6520035)
Supplement: nmy118_supplement_table.pdf [file nmy118_supplement_table.pdf]

## Supplementary Data

**Supplemental Table:** A summary of recent studies that have focused on PAs and their associated health benefits.

| Aging-Related Diseases | PAs                                                                       | PAs Origins                                             | Model Organisms                                                                                  | Molecular Targets                                                                                                                                                                                                                                        | Reference |
|------------------------|---------------------------------------------------------------------------|---------------------------------------------------------|--------------------------------------------------------------------------------------------------|----------------------------------------------------------------------------------------------------------------------------------------------------------------------------------------------------------------------------------------------------------|-----------|
| Cancer                 | Grape seed procyanidin (GSP) (>98%)                                       | Grape seeds                                             | Multi-drug resistance (MDR)1-overpressing paclitaxel resistant ovarian cancer cells              | GSP reversed P-glycoprotein (P-gp) associated multi-drug resistance (MDR) by inhibiting the function and expression of P-gp through down-regulation of NF- $\kappa$ B and MAPK/ERK pathway mediated Y-box binding protein 1 (YB-1) nuclear translocation | 1         |
| Cancer                 | Procyanidin C1                                                            | Cinnamomi cortex (CC)                                   | Human lung adenocarcinoma A549 cells                                                             | Inhibitory effect on transforming growth factor (TGF)- $\beta$ -induced epithelial-to-mesenchymal transition (EMT)                                                                                                                                       | 2         |
| Cancer                 | Procyanidin B2-3,3'-di-O-gallate (B2G2)                                   | Chemically synthesized, gram-scale quantities           | Human prostate cancer PCa, PC3 and 22Rv1 cells                                                   | B2G2 induced apoptosis by inhibiting NF- $\kappa$ B and activator protein1 (AP1) transcriptional activity and nuclear translocation of signal transducer and activator of transcription3 (STAT3)                                                         | 3         |
| Cancer                 | Oligomeric procyanidin, average degree of polymerization (DP) = 3.9       | French cider apple ( <i>Malus domestica</i> )           | Human esophageal adenocarcinoma OE33 and esophageal epithelial (HEECs) cells                     | Induction of cell cycle arrest and apoptosis via JNK mediated activation of c-Jun                                                                                                                                                                        | 4         |
| Cancer                 | Acetylated procyanidin B1                                                 | Chemically synthesized                                  | Human cervical adenocarcinoma HeLa-S3 cell                                                       | Inhibitory effect on HeLa S3 cell proliferation                                                                                                                                                                                                          | 5         |
| Cancer                 | Procyanidin A2                                                            | American cranberry ( <i>Vaccinium macrocarpon</i> Ait.) | Human hepatocytes                                                                                | Stimulatory effect on main drug metabolizing enzymes namely five forms of cytochromes P450 (CYP) except CYP2A6                                                                                                                                           | 6         |
| Cancer                 | Flavan-3-ol, <i>Vitis labrusca</i> seed extract (VLE)                     | Grape seeds ( <i>Vitis labrusca</i> )                   | Human liver cancer HepG2 and breast cancer MCF-7 cells                                           | Induction of p53 and peroxisome proliferator-activated receptor (PPAR) related DNA damage and accompanied NO production                                                                                                                                  | 7         |
| Cancer                 | Epigallocatechin-3-gallate (EGCG), procyanidin B2-3, 3'-di-O-gallate (B2) | Chemically synthesized                                  | Human invasive breast cancer cell MDA-MB-231 and immortalized human keratinocyte cell HaCaT      | Attenuation of DNA methyltransferases (DNMTs), a key epigenetic enzyme, and DNMT target genes E-cadherin, Maspin and BRCA1                                                                                                                               | 8         |
| Cancer                 | Standardized GSPE (90% procyanidins)                                      | White grapes ( <i>Vitis vinifera</i> L.)                | Lung neoplastic cells NSCLC, A549, H520, H1299, BEAS-2B and the bronchial premalignant cell line | Antineoplastic effect through the modulation of oncomirs miR-19a and -19b, mRNA and protein levels of insulin-like growth factor II receptor (IGF-2R) and phosphatase and tensin homolog (PTEN)                                                          | 9         |

## Supplementary Data

|                         |                                                                                          |                                                                                            |                                                                                                                    |                                                                                                                                                                                                                                                                       |    |
|-------------------------|------------------------------------------------------------------------------------------|--------------------------------------------------------------------------------------------|--------------------------------------------------------------------------------------------------------------------|-----------------------------------------------------------------------------------------------------------------------------------------------------------------------------------------------------------------------------------------------------------------------|----|
| Cancer                  | Purified white grape pomace extract (PWGPE)                                              | Grape pomace ( <i>Zalema</i> )                                                             | Human colon adenocarcinoma cell Caco-2                                                                             | Inhibitory effect on Caco-2 cell proliferation                                                                                                                                                                                                                        | 10 |
| Cancer                  | Flavonoids extracted from <i>Orostachys japonicus A. Berger</i> (FEOJ)                   | <i>Orostachys japonicus A. Berger</i>                                                      | U937 human leukemic cancer cell                                                                                    | Induction of caspase-dependent cancer cell apoptosis through the suppression of mitochondrial membrane potential, BLC-2, XIAP proteins and p38 MAPK signaling                                                                                                         | 11 |
| Cancer                  | Trimeric PAs, hexamer and the cocoa flavanol extract                                     | Cocoa liquor and chocolates                                                                | Colorectal cancer cell (CRC)                                                                                       | Inhibitory effect on colorectal cancer cell growth through the regulation of Akt kinase pathway                                                                                                                                                                       | 12 |
| Cancer                  | Cocoa procyanidins                                                                       | Non-alkalized cocoa powder                                                                 | Human ovarian cancer OAW42 and OVCAR3 cells                                                                        | Suppression of the growth of ovarian cancer <i>in vitro</i> while stimulation of the viability of normal dermal fibroblasts, affecting cell cycle and the expression of P-glycoprotein (P-gp)                                                                         | 13 |
| Cancer                  | Procyanidin A2                                                                           | Chemically synthesized                                                                     | Human alveolar epithelial A549 cell                                                                                | Temporal inhibition of chemokine eotaxin-3 (CCL26) production                                                                                                                                                                                                         | 14 |
| Cancer                  | Leucoselect® Phytosome® grape seed procyanidin extract (LP, Indena S.p.A., Milan, Italy) | A formulation of lower procyanidin oligomers from grape seeds ( <i>Vitis vinifera L.</i> ) | Human lung premalignant and malignant cells, bronchoalveolar lavage (BAL) cell                                     | Stimulatory effect on the production of prostacyclin synthase (PTGIS)/PGI2 and 15-lipoxygenase-2 (15-LOX-2)/15-HETE                                                                                                                                                   | 15 |
| Cardiovascular diseases | Grape seed procyanidin extract (GSPE)                                                    | White grape seeds ( <i>Vitis vinifera L.</i> )                                             | Spontaneously hypertensive rats (SHR), a model of genetically hypertensive rats and normotensive Wistar-Kyoto rats | GSPE significantly reduced the systolic and diastolic blood pressure of spontaneously hypertensive rats while did not affect blood pressure of normotensive Wistar-Kyoto rats                                                                                         | 16 |
| Cardiovascular diseases | Cacao liquor procyanidin extract (CLPr)                                                  | Cacao liquor                                                                               | L6 myotubes to myoblasts                                                                                           | Low-DP procyanidins stimulated glucose uptake by glucose transporter 4 translocation through AMP-activated protein kinase (AMPK)-dependent pathway in skeletal muscle; high-DP procyanidins mainly inhibited the activity of $\alpha$ -glucosidase in small intestine | 17 |
| Cardiovascular diseases | Low-molecular-weight procyanidin rich grape seed extract (LM-GSPE)                       | White grape seeds ( <i>Vitis vinifera L.</i> )                                             | Male spontaneously hypertensive rats (SHR)                                                                         | LM-GSPE presented antihypertensive effects in an endothelium dependent manner, which is related to the bioavailability of endothelium-derived nitric oxide and prostacyclin                                                                                           | 18 |
| Cardiovascular diseases | Grape seed procyanidin B2 (GSPB2) (> 90%)                                                | Grape seeds liquid-solid extraction                                                        | Male C57BLKS/J <i>db/db</i> and age-matched <i>db/m</i> mice                                                       | Regulation of the expression of key proteins involved in cardiac fibrosis and proliferation                                                                                                                                                                           | 19 |

## Supplementary Data

|                         |                                                                                         |                                                                                                                  |                                                                                                                                                                                                 |                                                                                                                                                                                                                                                                                                                                                                         |    |
|-------------------------|-----------------------------------------------------------------------------------------|------------------------------------------------------------------------------------------------------------------|-------------------------------------------------------------------------------------------------------------------------------------------------------------------------------------------------|-------------------------------------------------------------------------------------------------------------------------------------------------------------------------------------------------------------------------------------------------------------------------------------------------------------------------------------------------------------------------|----|
| Cardiovascular diseases | Procyanidin C1 (Pro C1)                                                                 | Chemically synthesized                                                                                           | Phenylephrine-constricted endothelium-intact thoracic aortic rings, denuded thoracic aortic rings                                                                                               | Vasorelaxant effect on phenylephrine-constricted endothelium-intact thoracic aortic rings, regulating calcium-dependent NO/cyclic guanosine monophosphate (cGMP) pathway                                                                                                                                                                                                | 20 |
| Cardiovascular diseases | (-)-epicatechin and its derived dimer procyanidin B2 (> 98%)                            | Chemically synthesized                                                                                           | Isolated rat heart mitochondria                                                                                                                                                                 | Inhibitory effect on the oxidative phosphorylation of isolated rat heart mitochondria in a substrates dependent manner                                                                                                                                                                                                                                                  | 21 |
| Cardiovascular diseases | Oligopin® (OP, Purextract, Dax, France), low molecular weight procyanidins              | French maritime pine bark (FMPB)                                                                                 | Eligible patients were recruited from the outpatient clinics of Hospital Universitari Sant Joan de Reus                                                                                         | Improvement of lipid cardiovascular profile, increasing high density lipoprotein-cholesterol (HDL-c) in stage-I-hypertensive subjects                                                                                                                                                                                                                                   | 22 |
| Cardiovascular diseases | Procyanidin B2-3,3'-di- O-gallate (B2G2)                                                | Grape seeds                                                                                                      | Human umbilical vein endothelial cells (HUVECs) and prostate microvascular endothelial cells (HPMECs)                                                                                           | B2G2 inhibited growth and induced death in both HUVECs and HPMECs, causing G1 arrest in cell cycle. B2G2 also inhibited the motility and invasiveness of both HUVECs and HPMECs via the VEGFR2/PI3K/Akt and integrin signaling                                                                                                                                          | 23 |
| Cardiovascular diseases | Grape seed procyanidin extract (GSPE)                                                   | White grape seeds ( <i>Vitis vinifera L.</i> )                                                                   | Male 8-week-old Wistar rats fed with cafeteria or standard diet                                                                                                                                 | Regulation of levels of endothelium-derived NO and endothelial prostacyclin                                                                                                                                                                                                                                                                                             | 24 |
| Cardiovascular diseases | Grape seed procyanidin extract (GSPE)                                                   | Grape seeds liquid-solid extraction                                                                              | Male Sprague-Dawley rats exposed to intermittent chronic hypoxia for 4 weeks to mimic a severe hypoxic pulmonary hypertension (HPH) condition and pulmonary artery smooth muscle cells (PASMCs) | GSPE prevented HPH via antioxidant and antiproliferative mechanisms, up-regulating superoxide dismutase (SOD) and suppressing malondialdehyde (MDA), NOX4, reactive oxygen species (ROS) and pulmonary artery smooth muscle cells (PASMCs) proliferation; GSPE also suppressed the increase of phospho-STAT3, cyclin D1, cyclin D3 and Ki67 in PASMCs caused by hypoxia | 25 |
| Obesity                 | Cacao liquor procyanidin (CLPr) extract                                                 | Cacao beans ( <i>Theobroma cacao</i> )                                                                           | C57BL/6 mice exposed to high-fat diet                                                                                                                                                           | Suppression of high-fat diet-induced hyperglycemia, glucose intolerance and lipid deposits via the activation of AMP-activated protein kinase $\alpha$ (AMPK $\alpha$ ), translocation of glucose transporter 4 (GLUT4) and up-regulation of uncoupling protein (UCP)-1                                                                                                 | 26 |
| Obesity                 | Epicatechin-(4 $\beta$ →6)-epicatechin-(2 $\beta$ →O→7, 4 $\beta$ →8)-catechin (EEC)    | Peanut skin ( <i>Arachis hypogaea L.</i> )                                                                       | A cholesterol micellar solution                                                                                                                                                                 | Hypocholesterolaemia activity via regulating the micelle degradation in the intestine                                                                                                                                                                                                                                                                                   | 27 |
| Obesity                 | Flavangenol® (72.5% polyphenols, pine bark extracts, Toyo Shinyaku Co.), procyanidin B1 | Flavangenol is a trademark for several pine bark extracts obtained from the pine trees ( <i>Pinus maritima</i> ) | Male metabolic syndrome model animal (TSOD) and control of TSOD (TSNO) mice; HepG2 cells                                                                                                        | Flavangenol®, especially procyanidin B1 as the major components, suppressed fat accumulation and induced the mRNA expression of fatty acid oxidative enzymes                                                                                                                                                                                                            | 28 |

## Supplementary Data

|          |                                                                                                                                |                                                       |                                                                                                                            |                                                                                                                                                                                                                                                                                  |    |
|----------|--------------------------------------------------------------------------------------------------------------------------------|-------------------------------------------------------|----------------------------------------------------------------------------------------------------------------------------|----------------------------------------------------------------------------------------------------------------------------------------------------------------------------------------------------------------------------------------------------------------------------------|----|
| Obesity  | Grape seed procyanidin extract (GSPE)                                                                                          | White grape seeds ( <i>Vitis vinifera</i> L.)         | Obese female Zucker <i>fa/fa</i> rats                                                                                      | A moderate dose of GSPE down-regulated the expression of inducible nitric oxide synthase (iNOS) and Il-6 and up-regulated the expression of adiponectin in adipocytes                                                                                                            | 29 |
| Obesity  | Grape seed procyanidin extract (GSPE)                                                                                          | Grape seeds                                           | Human colorectal adenocarcinoma cells (Caco-2); wild type (WT) and farnesoid x receptor ( <i>Fxr</i> ) <sup>-/-</sup> mice | GSPE lowered triglyceride levels, selectively modulated intestinal expression of FXR-target genes (e.g. hepatic cholesterol 7 $\alpha$ -hydroxylase (CYP7A1) and fibroblast growth factor 15 (FGF-15)), altering enterohepatic bile acids (BA) recirculation                     | 30 |
| Obesity  | Grape seed procyanidin extract (GSPE)                                                                                          | White grape seeds ( <i>Vitis vinifera</i> L.)         | Female virgin rats (Charles River Laboratories, Spain) were mated with males until impregnation                            | Increase of adiposity index and the weight of white adipose tissue depots of offspring, via regulating the expression of 238 genes associated with immunity, inflammation, lipid and glucose homeostasis and the metabolism of methyl groups                                     | 31 |
| Obesity  | Grape seed procyanidin extract (GSPE)                                                                                          | White grape seeds ( <i>Vitis vinifera</i> L.)         | Fructose-fed male Wistar rats                                                                                              | Inhibitory effect on hepatic lipogenesis via the down-regulation of sterol regulatory element binding protein 1c (SREBP1c) and stearoyl-CoA desaturase 1, targeting the bile acids (BA) homeostasis and non-biliary cholesterol excretion                                        | 32 |
| Obesity  | Procyanidin A2 (> 99%)                                                                                                         | Chemically synthesized                                | Liver tissue collected from normolipidemic male C57BL/6 mice                                                               | Decrease of serum triglyceride <i>in vivo</i> via the epigenetic regulation modulating histone deacetylases and peroxisome proliferator-activated receptor $\alpha$ (PPARA) activity; Cholesterol synthesis and excretion in in various physiological states were also regulated | 33 |
| Obesity  | Grape seed procyanidin extract (GSPE)                                                                                          | Grape seeds                                           | C57BL/6 mice                                                                                                               | Enhancement of <i>de novo</i> bile acid biosynthesis, regulating intestinal expression of IBABP and FGF15 and hepatic expression of CYP7A1 and SREBP1c                                                                                                                           | 34 |
| Obesity  | Grape seed procyanidin extract (GSPE): monomers (68.68 $\pm$ 0.02%), dimers (26.16 $\pm$ 0.01%) and trimers (5.16 $\pm$ 0.02%) | Grape seeds                                           | Farnesoid x receptor ( <i>Fxr</i> ) <sup>-/-</sup> mice                                                                    | GSPE selectively regulated intestinal <i>Fxr</i> target genes involved in bile acids (BA) uptake and transport, up-regulating both gene and protein expression of hepatic cholesterol 7 $\alpha$ -hydroxylase (Cyp7A1)                                                           | 35 |
| Obesity  | Grape seed procyanidin (GSP)                                                                                                   | Chemically synthesized                                | 3T3-L1 preadipocyte cell line                                                                                              | Decrease of intracellular lipid accumulation in induced 3T3-L1 cells, targeting miR-483-5p and peroxisome proliferator-activated receptor $\gamma$ (PPARG)                                                                                                                       | 36 |
| Diabetes | <i>Cinnamomum cassia</i> extract (CC-E) and <i>Cinnamomum tamala</i> extract (CT-E) PAs enriched                               | <i>Cinnamomum cassia</i> and <i>Cinnamomum tamala</i> | 8-week-old diabetic ( <i>db/db</i> ) mice                                                                                  | CC-E promoted lipid accumulation in the adipose tissues and liver, whereas CT-E improved the insulin concentration in the blood and pancreas                                                                                                                                     | 37 |

## Supplementary Data

|          |                                                                       |                                               |                                                                                   |                                                                                                                                                                                                                                                                                                                                        |    |
|----------|-----------------------------------------------------------------------|-----------------------------------------------|-----------------------------------------------------------------------------------|----------------------------------------------------------------------------------------------------------------------------------------------------------------------------------------------------------------------------------------------------------------------------------------------------------------------------------------|----|
| Diabetes | Grape seed procyanidin B2 (GSPB2)                                     | Grape seeds                                   | Male C57BLKS/J <i>db/db</i> and their nondiabetic <i>db/m</i> littermates         | Decrease of protein levels of milk fat globule EGF-8 (MFG-E8), phospho-ERK1/2, phospho-Akt and phospho-GSK-3 $\beta$ in the kidney of <i>db/db</i> mice                                                                                                                                                                                | 38 |
| Diabetes | Grape seed procyanidin extract (GSPE)                                 | White grape seeds ( <i>Vitis vinifera</i> L.) | INS-1E pancreatic $\beta$ -cell line                                              | High molecular weight GSPE components enhanced the pro-apoptotic effect of high glucose and showed clear antiproliferative effect under high levels of glucose, insulin and palmitate, but not basal conditions                                                                                                                        | 39 |
| Diabetes | Oligomeric procyanidins and cinnamtannin A2, a tetrameric procyanidin | Cacao liquor                                  | Male ICR mice                                                                     | Cinnamtannin A2 activated insulin receptor and insulin receptor substrate-1, increasing glucagon-like peptide-1 (GLP-1) and insulin secretion in the plasma                                                                                                                                                                            | 40 |
| Diabetes | Cacao liquor procyanidin (CLPr)                                       | Cacao liquor                                  | Male ICR and C57BL/6 mice; L6 myoblasts (passage 27-37)                           | CLPr improved glucose tolerance by promoting GLUT4 translocation to the plasma membrane of skeletal muscle                                                                                                                                                                                                                             | 41 |
| Diabetes | Grape seed procyanidin extract (GSPE)                                 | White grape seeds ( <i>Vitis vinifera</i> L.) | Zucker fatty (ZF) rats: 5-week-old lean and obese female Zucker <i>fa/fa</i> rats | GSPE limited the synthesis and secretion of insulin and modulated factors involved in apoptosis                                                                                                                                                                                                                                        | 42 |
| Diabetes | Procyanidin-B2                                                        | Cinnamon ( <i>Cinnamomum zeylencium</i> )     | Male Wistar-NIN (WNIN) rats                                                       | Delay of diabetic cataract via inhibiting the accumulation of advanced glycation end products (AGE) in diabetic rats                                                                                                                                                                                                                   | 43 |
| Diabetes | Procyanidin-B2 (PCB2)                                                 | Cinnamon ( <i>Cinnamomum zeylencium</i> )     | Streptozotocin-induced diabetic rats                                              | Cinnamon and PCB2-fraction down-regulated advanced glycation end products (AGE), ameliorated diabetes mediated renal malfunction in rats as seen the reduced urinary albumin and creatinine                                                                                                                                            | 44 |
| Diabetes | Procyanidin                                                           | Chemically synthesized                        | Sprague Dawley (SD) rats                                                          | Neuroprotective effect on type 2 diabetes mellitus-middle cerebral artery occlusion (MCAO), via down-regulating the expression level of SATA1 involved in the kinase/signal transducer and activator of transcription (JAK/STAT) pathway                                                                                               | 45 |
| Diabetes | Grape seed procyanidin B2 (GSPB2) (> 95%)                             | Grape seeds                                   | Diabetic <i>db/db</i> mice                                                        | Protective effect on diabetic pancreas and islet, improving the level of insulin and homeostatic model assessment-insulin resistance (HOMA-IR) while reducing the level of milk fat globule epidermal growth factor-8 (MFG-E8), pro-inflammatory cytokines interleukin-1 $\beta$ (IL-1 $\beta$ ) and pyrin domain containing 3 (NLRP3) | 46 |

## Supplementary Data

|          |                                                                                                                    |                                           |                                                        |                                                                                                                                                                                                                                                                                                                                                                                                                                                                   |    |
|----------|--------------------------------------------------------------------------------------------------------------------|-------------------------------------------|--------------------------------------------------------|-------------------------------------------------------------------------------------------------------------------------------------------------------------------------------------------------------------------------------------------------------------------------------------------------------------------------------------------------------------------------------------------------------------------------------------------------------------------|----|
| Diabetes | Grape seed procyanidin B2 (GSPB2)                                                                                  | Grape seeds liquid-solid extraction       | Rat mesangial cells (HBZY-1)                           | GSPB2 inhibited apoptosis in rat mesangial cells treated with glucosamine (GlcN) under high-dose conditions, suppressed oxidative stress by elevating the activity of glutathione peroxidase and superoxide dismutase, activated the expression of peroxisome proliferator-activated receptor $\gamma$ (PPARG) co-activator-1 $\alpha$ (PGC-1 $\alpha$ ), silent mating type information regulation 2 homologue 1 (SIRT1) and AMP-activated protein kinase (AMPK) | 47 |
| Diabetes | Procyanidin B2                                                                                                     | Chemically synthesized                    | HK-2 human renal proximal tubular epithelial cell line | Pretreatment with procyanidin B2 reversed the high glucose induced epithelial mesenchymal transition (EMT)-associated changes, up-regulated the expression of E-cadherin and down-regulated the expression level of vimentin and $\alpha$ SMA, decreased the phosphorylation of small mothers against decapentaplegic (SMAD)2, 3 and P38, and up-regulated the expression of phosphorylatedSMAD7                                                                  | 48 |
| Diabetes | Procyanidin A2 (PCA2)                                                                                              | Chemically synthesized                    | NMRI male mice                                         | PCA2 strongly prevented islet cell apoptosis, reduced mRNA expression of pancreatic and duodenal homeobox 1 ( <i>Pdx1</i> ) and glucose transporter 2 ( <i>Glut2</i> ) and the antioxidant level in pancreas tissue induced by bisphenol A                                                                                                                                                                                                                        | 49 |
| Diabetes | ChoronoCare® black soybean seed coat extract (BE, Fujicco, Hyogo, Japan): 68.7% polyphenols and 40.7% flavan-3-ols | Black soybean seed                        | Male ICR mice                                          | Trimeric and tetrameric procyanidins, especially cinnamtannin A2, suppressed acute hyperglycaemia, activated both insulin- and AMP-activated protein kinase (AMPK) signaling and induced GLUT4 translocation in muscle                                                                                                                                                                                                                                            | 50 |
| Diabetes | Epicatechin-(4 $\beta$ →6)-epicatechin-(2 $\beta$ →O→7, 4 $\beta$ →8)-catechin (EEC)                               | Peanut skin ( <i>Arachis hypogaea</i> L.) | Caco-2 cell                                            | Procyanidin dimer EEC, compared to (+)-catechin, inhibited $\alpha$ -amylase activity and glucose transport in Caco-2 cells                                                                                                                                                                                                                                                                                                                                       | 51 |
| Diabetes | A-type procyanidin trimer cinnamtannin-1 (CT1) and its methylated products (MPs)                                   | <i>Cinnamomum tamala</i>                  | Palmitic acid-treated INS-1 cell                       | Compared to CT1, O-methyl derivatives of CT1 presented less protective capacity on a palmitic acid-induced pancreatic $\beta$ -cell apoptosis model, which might be attributed to the obstructed formation of quinone intermediate and thus antioxidant ability                                                                                                                                                                                                   | 52 |

## Supplementary Data

|           |                                                                             |                                                                                                                                                  |                                                                                                                                            |                                                                                                                                                                                                                                                                                                                   |    |
|-----------|-----------------------------------------------------------------------------|--------------------------------------------------------------------------------------------------------------------------------------------------|--------------------------------------------------------------------------------------------------------------------------------------------|-------------------------------------------------------------------------------------------------------------------------------------------------------------------------------------------------------------------------------------------------------------------------------------------------------------------|----|
| Diabetes  | Trimeric procyanidin oligomers                                              | <i>Cinnamomum tamala</i> (CT-E) and <i>Cinnamomum cassia</i> (CC-E)                                                                              | INS-1 pancreatic $\beta$ -cells exposed to palmitic acid (PA) or H <sub>2</sub> O <sub>2</sub> to induce lipotoxicity and oxidative stress | Trimer procyanidins cpd3, cpd4 and cpd6 dose-dependently increased the cell viability, decreased reactive oxygen species (ROS) accumulation in H <sub>2</sub> O <sub>2</sub> -treated $\beta$ -cells and increased glucose-stimulated insulin secretion in PAs treated $\beta$ -cells                             | 53 |
| Diabetes  | Procyanidin (OPC)                                                           | Not mentioned                                                                                                                                    | Sprague-Dawley rat bone marrow mononuclear cell and endothelial progenitor cell (EPCs) exposed to high glucose (HG)                        | OPC significantly reduced the level of oxidative stress related products, up-regulated the expression of vascular endothelial growth factor receptor-2 (VEGFR-2), Protein kinase B (AKT), NF- $\kappa$ B protein and down-regulated the expression of NF- $\kappa$ B inhibitor $\alpha$ (I $\kappa$ B- $\alpha$ ) | 54 |
| Diabetes  | Grape seed procyanidin B2 (GSPB2)                                           | Grape seeds liquid-solid extraction                                                                                                              | Podocytes injured in rats with diabetic nephropathy (DN)                                                                                   | GSPB2 protected podocytes from high glucose-induced mitochondrial dysfunction and apoptosis via the AMP-activated protein kinase (AMPK)-SIRT1-PGC-1 $\alpha$ axis <i>in vitro</i>                                                                                                                                 | 55 |
| Oxidation | Procyanidin B2 (PB2)                                                        | Cocoa flavonoids                                                                                                                                 | Human colonic Caco-2 cell                                                                                                                  | PB2 induced the expression and activity of glutathione S-transferase P1 (GSTP1), nuclear translocation of the transcription factor NF-erythroid 2-related factor (NRF2), extracellular signal-regulated protein kinases (ERKs) and p38 mitogen-activated protein kinase (MAPK)                                    | 56 |
| Oxidation | Grape seed procyanidins extract (GSPE)                                      | Grape seeds liquid-solid extraction                                                                                                              | Adult Kunming mice administered with dietary cadmium (Cd)-incorporated diet                                                                | GSPE attenuated cadmium-induced lipid peroxidation and renal damage, probably associated with the expression of BAX and BCL-2                                                                                                                                                                                     | 57 |
| Oxidation | A specific blend of resveratrol (3,5,40-trihydroxystilbene) and procyanidin | One capsule of supplement contains 8 mg transresveratrol and 133 mg grape ( <i>Vitis vinifera</i> L.) extract from a patented production process | 50 human subjects (25 treated with supplements and 25 with placebo)                                                                        | Short term treatment of resveratrol and procyanidin improved clinical features induced by chronoaging or photoaging, including skin hydration, elasticity, roughness levels and systemic oxidative stress levels                                                                                                  | 58 |
| Oxidation | Procyanidin C1                                                              | White grape seeds ( <i>Vitis vinifera</i> L.)                                                                                                    | Rat aortic endothelial cells (RAECs)                                                                                                       | Procyanidin C1 induced NO production in RAECs via both Ca <sup>2+</sup> -dependent Ca <sup>2+</sup> -activated K <sup>+</sup> (BK <sub>Ca</sub> ) channel-mediated hyperpolarization and Ca <sup>2+</sup> -independent PI3K/Akt pathways                                                                          | 59 |

## Supplementary Data

|              |                                                                                                                                          |                                                |                                                                                                                                                 |                                                                                                                                                                                                                                                                                                                                                                                                 |    |
|--------------|------------------------------------------------------------------------------------------------------------------------------------------|------------------------------------------------|-------------------------------------------------------------------------------------------------------------------------------------------------|-------------------------------------------------------------------------------------------------------------------------------------------------------------------------------------------------------------------------------------------------------------------------------------------------------------------------------------------------------------------------------------------------|----|
| Oxidation    | Procyanidin B2 (> 95%)                                                                                                                   | Not mentioned                                  | CCl <sub>4</sub> -treated (hepatotoxicity) male ICR mice                                                                                        | Protective effect on hepatic injury by elevating the antioxidative defense potential, decreasing the expression of TNF- $\alpha$ , IL-1 $\beta$ , cyclooxygenase-2 (COX-2), inducible nitric oxide synthase (iNOS) and the translocation of nuclear factor-kappa B (NF- $\kappa$ B) p65, and suppressing the inflammatory response via apoptosis-related <i>Bax</i> and <i>Bcl-xL</i> signaling | 60 |
| Oxidation    | Grape seed procyanidin B2 (GSPB2)                                                                                                        | Grape                                          | Granulosa cell                                                                                                                                  | GSPB2 decreased the expression of transcription factor forkhead box protein O1 (FoxO1), improved granulosa cell viability, up-regulated the expression of autophagy gene LC3-II, and reduced granulosa cell apoptosis rate                                                                                                                                                                      | 61 |
| Oxidation    | Procyanidin (PCA) (> 95%)                                                                                                                | Pine needles                                   | Broiler chicks                                                                                                                                  | PCA prevented lipopolysaccharide (LPS)-induced oxidative stress response <i>in vivo</i> and improved the morphology of the small intestine, via increasing the activity of antioxidant enzymes and scavenging free radical activity                                                                                                                                                             | 62 |
| Oxidation    | Proanthocyanidin analogue, the geometry of one catechin molecule in procyanidin B3, a dimer of (+)-catechin, is constrained to be planar | Chemically synthesized                         | Non-aqueous system using galvinoxyl radical as an oxyl radical species                                                                          | The radical scavenging activity of procyanidin was 3.8 times more potent than (+)-catechin, with the potent of proanthocyanidin analogue 1 further increased to 1.9 times that of procyanidin B3                                                                                                                                                                                                | 63 |
| Inflammation | Crude polyphenolic extract (CPE) and its procyanidin fractions from defatted grape seeds                                                 | Grape seeds ( <i>Campbell Early</i> )          | HepG2 cells with oxidative damage induced by tert-butyl hydroperoxide (TBHP)                                                                    | The oligomeric procyanidin fraction (OPF) and the polymeric procyanidin fraction (PPF) presented cytoprotective effect against oxidative damage by modulating reactive oxygen species (ROS) production, glutathione (GSH) level, malondialdehyde (MDA) formation and antioxidant enzyme activity                                                                                                | 64 |
| Inflammation | Grape seed procyanidin extract (GSPE)                                                                                                    | White grape seeds ( <i>Vitis vinifera L.</i> ) | A rat model of septic shock by intraperitoneal injection of lipopolysaccharide (LPS) derived from <i>Escherichia coli</i> to Wistar female rats | Several doses of GSPE alleviated acute inflammation triggered by lipopolysaccharide (LPS) in rats at systemic and local levels by down-regulating the expression of Il-6 and iNOS                                                                                                                                                                                                               | 65 |



## Supplementary Data

|              |                                                                                |                                                |                                                       |                                                                                                                                                                                                                                                                                                                    |    |
|--------------|--------------------------------------------------------------------------------|------------------------------------------------|-------------------------------------------------------|--------------------------------------------------------------------------------------------------------------------------------------------------------------------------------------------------------------------------------------------------------------------------------------------------------------------|----|
| Inflammation | Procyanidin trimer C1                                                          | Chemically synthesized                         | Murine macrophage cell line RAW264.7                  | Procyanidin C1 promoted anti-inflammatory activity in macrophages, through the inhibition of mitogen-activated protein kinase (p38 and c-Jun N-terminal kinase) and NF- $\kappa$ B signaling                                                                                                                       | 66 |
| Inflammation | Procyanidin dimer B2 (Pro B2)                                                  | Chemically synthesized                         | Murine macrophage cell line RAW264.7                  | Pro B2 down-regulated toll-like receptor 4 (TLR4) signal transduction in macrophages; Pro B2-treated macrophages inactivated naïve T cells by inhibiting lipopolysaccharide (LPS)-induced interferon- $\gamma$ and interleukin (IL)-2 secretion through IL-1 receptor-associated kinase (IRAK)-M protein signaling | 67 |
| Inflammation | Procyanidin trimer C1                                                          | Chemically synthesized                         | Murine macrophage cell line RAW264.7                  | Procyanidin C1 regulated innate and adaptive immunity by activating macrophage and Th1 polarization, via NF- $\kappa$ B and mitogen-activated protein kinases (MAPK) pathways                                                                                                                                      | 68 |
| Inflammation | Oligomeric procyanidin fraction (OPF) and polymeric procyanidin fraction (PPF) | Defatted grape seeds ( <i>Campbell Early</i> ) | HepG2 cell                                            | PPF significantly increased the expression of nuclear factor erythroid 2-related factor 2 (Nrf2), inhibiting ROS production and inducing heme oxygenase-1 (HO-1) and NAD(P): Quinone oxidoreductase 1 (NQO1) expression                                                                                            | 69 |
| Inflammation | Procyanidin B2 (PCB2)                                                          | Chemically synthesized                         | Human umbilical vein endothelial cell (HUVECs)        | PCB2 suppressed the activation of pyrin domain containing 3 (NLRP3) inflammasome, lipopolysaccharides (LPS)-induced production of reactive oxygen species (ROS) and the transcriptional activity of activator protein-1 (AP-1)                                                                                     | 70 |
| Inflammation | Procyanidin extract                                                            | Grape seeds                                    | Crossbred pigs                                        | Dietary addition of procyanidin improved feed efficiency and anti-inflammatory cytokines (interleukin) IL-1 $\beta$ , IL-6 and tumor necrosis factor (TNF)- $\alpha$                                                                                                                                               | 71 |
| Inflammation | Procyanidin B2 (epicatechin-(4 $\beta$ →8)-epicatechin)                        | Chemically synthesized                         | Lipopolysaccharide (LPS)-primed THP-1-human monocytes | Procyanidin B2 inhibited inflammasome activation, inactivating NF- $\kappa$ B signaling through its inhibition of p65 nuclear expression and DNA binding, and (interleukin) IL-1 $\beta$ secretion during lipopolysaccharide (LPS)-induced acute inflammation                                                      | 72 |

## Supplementary Data

|                                                                      |                                                                                           |                                                                                       |                                                                                                         |                                                                                                                                                                                                                                                                                                                                                                                                                                                                                |    |
|----------------------------------------------------------------------|-------------------------------------------------------------------------------------------|---------------------------------------------------------------------------------------|---------------------------------------------------------------------------------------------------------|--------------------------------------------------------------------------------------------------------------------------------------------------------------------------------------------------------------------------------------------------------------------------------------------------------------------------------------------------------------------------------------------------------------------------------------------------------------------------------|----|
| Inflammation                                                         | Procyanidin B1                                                                            | Not mentioned                                                                         | Human monocyte cell line (THP1)                                                                         | Procyanidin B1 suppressed the expression of tumor necrosis factor (TNF)- $\alpha$ , phosphorylated p38 mitogen-activated protein kinases (MAPK) and NF- $\kappa$ B, the transcription of myeloid differentiation factor (MD)-2, TNF receptor-associated factor (TRAF)-6 and NF- $\kappa$ B, competing with lipopolysaccharides (LPS) to bind to the toll-like receptor (TLR)-4-MD-2 heterodimer to suppress the downstream activation of p38 MAPK and NF- $\kappa$ B signaling | 73 |
| Inflammation                                                         | Procyanidin A2, B1 and B2                                                                 | Chemically synthesized                                                                | Human lung epithelial cells (A549)                                                                      | Procyanidin A2 inhibited the production of eotaxin-1 (CCL11) that is linked with airway inflammation, while Procyanidin B1 and B2 elicited no effect                                                                                                                                                                                                                                                                                                                           | 74 |
| Articular cartilage degeneration and heterotopic cartilage formation | Procyanidin B3 (97%)                                                                      | Grape seed extract (82% proanthocyanidins)                                            | The mouse chondrogenic ATDC5 cell line and primary epiphyseal chondrocytes isolated from 5-day-old mice | Procyanidin B3 prevented osteoarthritis progression and heterotopic cartilage formation, probably through the suppression of inducible nitric oxide synthase (iNOS)                                                                                                                                                                                                                                                                                                            | 75 |
| Neurodegeneration                                                    | Procyanidin B1                                                                            | Yokukansan, a traditional Japanese (Kampo) medicine, derived from <i>Uncaria hook</i> | Amyloid $\beta$ oligomer pre-treated rat primary cultured cortical neurons                              | Procyanidin B1 inhibited amyloid $\beta$ oligomer-induced neuronal death in a dose-dependent manner, suppressing the activation of caspase-3, -8, and -9                                                                                                                                                                                                                                                                                                                       | 76 |
| Neurodegeneration                                                    | Procyanidin B2 (PB)                                                                       | Not mentioned                                                                         | Adult male Sprague-Dawley rats                                                                          | PB attenuated neurological deficits and blood-brain barrier (BBB) disruption in a rat model of cerebral ischemia, associated with activation of NF-erythroid 2-related factor ( <i>Nrf-2</i> ) pathway                                                                                                                                                                                                                                                                         | 77 |
| Neurodegeneration                                                    | Gallotannin, a class of hydrolyzable tannins consisting of gallic acid and a sugar moiety | Tannin-rich plants                                                                    | Cell-free models, micro-organelles or H <sub>2</sub> O <sub>2</sub> activated cell bodies               | Gallotannins were neuroprotective partially attributed to their antioxidant property, blocking the accumulation of nitrites, inhibiting the expression and activity of heme oxygenase 1 (HO-1), and decreasing the degradation of poly (ADP ribose) glycohydrolase (PARP)                                                                                                                                                                                                      | 78 |

## Supplemental References

- [1] B.X. Zhao, Y.B. Sun, S.Q. Wang, L. Duan, Q.L. Huo, F. Ren, G.F. Li, Grape seed procyanidin reversal of p-glycoprotein associated multi-drug resistance via down-regulation of NF- $\kappa$ B and MAPK/ERK mediated YB-1 activity in A2780/T cells, *PLoS One*, 8 (2013) e71071
- [2] R. Kin, S. Kato, N. Kaneto, H. Sakurai, Y. Hayakawa, F. Li, K. Tanaka, I. Saiki, S. Yokoyama, Procyanidin C1 from cinnamomi cortex inhibits TGF- $\beta$ -induced epithelial-to-mesenchymal transition in the A549 lung cancer cell line, *Int. J. Oncol.*, 43 (2013) 1901-6
- [3] A. Tyagi, K. Raina, S.P. Shrestha, B. Miller, J.A. Thompson, Wempe, M.F., R. Agarwal, C. Agarwal, Procyanidin B2 3,3''-di-O-gallate, a biologically active constituent of grape seed extract, induces apoptosis in human prostate cancer cells via targeting NF- $\kappa$ B, Stat3, and AP1 transcription factors, *Nutr. Cancer*, 66 (2015) 736-46
- [4] C.A. Connor, M. Adriaens, R. Pierini, I.T. Johnson, N.J. Belshaw, Procyanidin induces apoptosis of esophageal adenocarcinoma cells via JNK activation of c-Jun, *Nutr. Cancer*, 66 (2014) 335-41
- [5] S. Okamoto, S. Ishihara, T. Okamoto, S. Doi, K. Harui, Y. Higashino, T. Kawasaki, N. Nakajima, A. Saito, Inhibitory activity of synthesized acetylated procyanidin B1 analogs against HeLa S3 cells proliferation, *Molecules*, 19 (2014) 1775-85
- [6] J. Ulrichova, L. Jourova, V. Tomankova, P. Kosina, M. Kopečna-Zapletalova, E. Anzenbacherova, Effect of the procyanidin A2 on activity of cytochromes P450 in human hepatocytes, *Planta Med.*, 79 (2013) PJ2
- [7] G. Scola, C. Cilene Fernandes Correia Laurino, E. Menin, M. Salvador, Suppression of oncoprotein Her-2 and DNA damage after treatment with Flavan-3-ol Vitis labrusca extract, *Anticancer Agents Med. Chem.*, 13 (2013) 1088-95
- [8] A. Shilpi, S. Parbin, D. Sengupta, S. Kar, M. Deb, S.K. Rath, N. Pradhan, M. Rakshit, S.K. Patra, Mechanisms of DNA methyltransferase-inhibitor interactions: Procyanidin B2 shows new promise for therapeutic intervention of cancer, *Chem. Biol. Interact.*, 233 (2015) 122-38
- [9] J.T. Mao, B. Xue, J. Smoake, Q.Y. Lu, H. Park, S.M. Henning, W. Burns, A. Bernabei, D. Elashoff, K.J. Serio, L. Massie, MicroRNA-19a/b mediates grape seed procyanidin extract-induced anti-neoplastic effects against lung cancer, *J. Nutr. Biochem.*, 34 (2016) 118-25
- [10] M.J. Jara-Palacios, D. Hernanz, T. Cifuentes-Gomez, M.L. Escudero-Gilete, F.J. Heredia, J.P. Spencer, Assessment of white grape pomace from winemaking as source of bioactive compounds, and its antiproliferative activity, *Food Chem.*, 183 (2015) 78-82
- [11] W.S. Lee, J.W. Yun, A. Nagappan, J.H. Jung, S.M. Yi, D.H. Kim, H.J. Kim, G. Kim, C.H. Ryu, S.C. Shin, S.C. Hong, Flavonoids from *Orostachys japonicus* A. Berger induces caspase-dependent apoptosis at least partly through activation of p38 MAPK pathway in U937 human leukemic cells, *Asian Pac. J. Cancer Prev.*, 16 (2015) 465-9
- [12] Y.Y. Choy, M. Fraga, G.G. Mackenzie, A.L. Waterhouse, E. Cremonini, P.I. Oteiza, The PI3K/Akt pathway is involved in procyanidin-mediated suppression of human colorectal cancer cell growth, *Mol. Carcinog.*, 55(2016) 2196-209
- [13] S. Taparia, A. Khanna, Effect of procyanidin-rich extract from natural cocoa powder on cellular viability, cell cycle progression, and chemoresistance in human epithelial ovarian carcinoma cell lines, *Pharmacogn. Mag.*, 12 (2016) S109
- [14] S.L. Coleman, M.C. Kruger, G.M. Sawyer, R.D. Hurst, Procyanidin A2 modulates IL-4-induced CCL26 production in human alveolar epithelial cells, *Int. J. Mol. Sci.*, 17 (2016) 1888
- [15] J.T. Mao, J. Smoake, H.K. Park, Q.Y. Lu, B. Xue, Grape seed procyanidin extract mediates antineoplastic effects against lung cancer via modulations of prostacyclin and 15-HETE eicosanoid pathways, *Cancer Prev. Res. (Phila.)*, 9(2016) 925-32
- [16] M. Quiñones, L. Guerrero, M. Suarez, Z. Pons, A. Aleixandre, L. Arola, B. Muguerza, Low-molecular procyanidin rich grape seed extract exerts antihypertensive effect in males spontaneously hypertensive rats, *Food Res. Int.*, 51 (2013) 587-95

## Supplementary Data

- [17] Y. Yamashita, M. Okabe, M. Natsume, H. Ashida, Comparison of anti-hyperglycemic activities between low-and high-degree of polymerization procyanidin fractions from cacao liquor extract, *J. Food Drug Anal.*, 20 (2012) 284
- [18] M. Quiñones, L. Guerrero, S. Fernández-Vallinas, Z. Pons, L. Arola, A. Aleixandre, B. Muguerza, Involvement of nitric oxide and prostacyclin in the antihypertensive effect of low-molecular-weight procyanidin rich grape seed extract in male spontaneously hypertensive rats, *J. Funct. Foods*, 6 (2014) 419-27
- [19] S.S. Luan, F. Yu, B.Y. Li, R.J. Qin, X.L. Li, Q. Cai, W.B. Yin, M. Cheng, H.Q. Gao, Quantitative proteomics study of protective effects of grape seed procyanidin B2 on diabetic cardiomyopathy in db/db mice, *Biosci. Biotechnol. Biochem.*, 78 (2014) 1577-83
- [20] E.B. Byun, N.Y. Sung, M.S. Yang, D.S. Song, E.H. Byun, J.K. Kim, J.H. Park, B.S. Song, J.W. Lee, S.H. Park, M.W. Byun, Procyanidin C1 causes vasorelaxation through activation of the endothelial NO/cGMP pathway in thoracic aortic rings, *J. Med. Food.*, 17 (2014) 742-8
- [21] D.M. Kopustinskiene, A. Savickas, D. Vetchý, R. Masteikova, A. Kasauskas, J. Bernatoniene, Direct effects of (–)-epicatechin and procyanidin B2 on the respiration of rat heart mitochondria, *Biomed. Res. Int.*, (2015) 232836
- [22] R.M. Valls, E. Llauradó, S. Fernández-Castillejo, F. Puiggrós, R. Solà, L. Arola, A. Pedret, Effects of low molecular weight procyanidin rich extract from french maritime pine bark on cardiovascular disease risk factors in stage-1 hypertensive subjects: Randomized, double-blind, crossover, placebo-controlled intervention trial, *Phytomedicine*, 23 (2016) 1451-61
- [23] R. Kumar, G. Deep, M. F. Wempe, R. Agarwal, C. Agarwal, Procyanidin B2 3, 3''-di-O-gallate inhibits endothelial cells growth and motility by targeting VEGFR2 and integrin signaling pathways, *Curr. Cancer Drug Targets*, 15 (1) 14-26
- [24] Z. Pons, M. Margalef, F.I. Bravo, A. Arola-Arnal, B. Muguerza, Acute administration of single oral dose of grape seed polyphenols restores blood pressure in a rat model of metabolic syndrome: role of nitric oxide and prostacyclin, *Eur. J. Nutr.*, 55 (2016) 749-58
- [25] H. Jin, M. Liu, X. Zhang, J. Pan, J. Han, Y. Wang, H. Lei, Y. Ding, Y. Yuan, Grape seed procyanidin extract attenuates hypoxic pulmonary hypertension by inhibiting oxidative stress and pulmonary arterial smooth muscle cells proliferation, *J. Nutr. Biochem.*, 36 (2016) 81-8
- [26] Y. Yamashita, M. Okabe, M. Natsume, H. Ashida, Prevention mechanisms of glucose intolerance and obesity by cacao liquor procyanidin extract in high-fat diet-fed C57BL/6 mice, *Arch. Biochem. Biophys.*, 527 (2012) 95-104
- [27] T. Tamura, N. Inoue, M. Ozawa, A. Shimizu-Ibuka, S. Arai, N. Abe, H. Koshino, K. Mura, Peanut-skin polyphenols, procyanidin A1 and epicatechin-(4 $\beta$ →6)-epicatechin-(2 $\beta$ →O→7, 4 $\beta$ →8)-catechin, exert cholesterol micelle-degrading activity in vitro, *Biosci. Biotechnol. Biochem.*, 77 (2013) 1306-9
- [28] T. Shimada, D. Tokuhara, M. Tsubata, T. Kamiya, M. Kamiya-Sameshima, R. Nagamine, K. Takagaki, Y. Sai, K.I. Miyamoto, M. Aburada, Flavangenol (pine bark extract) and its major component procyanidin B1 enhance fatty acid oxidation in fat-loaded models, *Eur. J. Pharmacol.*, 677 (2012) 147-53
- [29] V. Pallarès, L. Cedó, A. Castell-Auví, M. Pinent, A. Ardévol, L. Arola, M. Blay, Effects of grape seed procyanidin extract over low-grade chronic inflammation of obese Zucker fa/fa rats, *Food Res. Int.*, 53 (2013) 319-24
- [30] R. Hintz, G. Caiozzi, M.L. Ricketts, A grape seed procyanidin extract lowers serum triglyceride levels via selective modulation of intestinal-target gene expression and inhibition of enterohepatic bile acid recirculation (1045.35), *FASEB J.*, 28.1 Supplement (2014) 1045-35
- [31] J.M. Del Bas, A. Crescenti, A. Arola-Arnal, G. Oms-Oliu, L. Arola, A. Caimari, Grape seed procyanidin supplementation to rats fed a high-fat diet during pregnancy and lactation increases the body fat content and modulates the inflammatory response and the adipose tissue metabolism of the male offspring in youth, *Int. J. Obes.*, 39 (2015) 7
- [32] L.E. Downing, R.M. Heidker, G.C. Caiozzi, B.S. Wong, K. Rodriguez, F. Del Rey, M.L. Ricketts, A grape seed procyanidin extract ameliorates fructose-induced hypertriglyceridemia in rats via enhanced fecal bile acid and cholesterol excretion and inhibition of hepatic lipogenesis, *PLoS One*, 10 (2015) e0140267
- [33] S.L. Coleman, M.C. Kruger, G.M. Sawyer, R.D. Hurst, Procyanidin A2 modulates IL-4-induced CCL26 production in human alveolar epithelial cells, *Int. J. Mol. Sci.*, 17 (2016) 1888

## Supplementary Data

- [34] R. Heidker, G. Caiozzi, M.L. Ricketts, Co-administration of a grape seed procyanidin extract and the bile acid sequestrant, cholestyramine, results in beneficial metabolic alterations, including decreased triglyceride levels, *FASEB J.*, 29.1 (2015) 271-5
- [35] R.M. Heidker, G.C. Caiozzi, M.L. Ricketts, Dietary procyanidins selectively modulate intestinal farnesoid X receptor-regulated gene expression to alter enterohepatic bile acid recirculation: elucidation of a novel mechanism to reduce triglyceridemia, *Mol. Nutr. Food Res.*, 60 (2016) 727-36
- [36] J. Zhang, Y. Huang, H. Shao, Q. Bi, J. Chen, Z. Ye, Grape seed procyanidin B2 inhibits adipogenesis of 3T3-L1 cells by targeting peroxisome proliferator-activated receptor  $\gamma$  with miR-483-5p involved mechanism, *Biomed. Pharmacother.*, 86 (2017) 292-6
- [37] L. Chen, P. Sun, T. Wang, K. Chen, Q. Jia, H. Wang, Y. Li, Diverse mechanisms of antidiabetic effects of the different procyanidin oligomer types of two different cinnamon species on db/db mice, *J. Agric. Food Chem.*, 60 (2012) 9144-50
- [38] Z. Zhang, B.Y. Li, X.L. Li, M. Cheng, F. Yu, Q. Cai, J.F. Wang, R.H. Zhou, H.Q. Gao, L. Shen, Proteomic analysis of kidney and protective effects of grape seed procyanidin B2 in *db/db* mice indicate MFG-E8 as a key molecule in the development of diabetic nephropathy, *Biochim. Biophys. Acta.*, 1832 (2013) 805-16
- [39] L. Cedó, A. Castell-Auví, V. Pallarès, M. Blay, A. Ardévol, L. Arola, M. Pinent, Grape seed procyanidin extract modulates proliferation and apoptosis of pancreatic beta-cells, *Food Chem.*, 138 (2013) 524-30
- [40] Y. Yamashita, M. Okabe, M. Natsume, H. Ashida, Cinnamtannin A2, a tetrameric procyanidin, increases GLP-1 and insulin secretion in mice, *Biosci. Biotechnol. Biochem.*, 77 (2013) 888-91
- [41] Y. Yamashita, M. Okabe, M. Natsume, H. Ashida, Cacao liquor procyanidin extract improves glucose tolerance by enhancing GLUT4 translocation and glucose uptake in skeletal muscle, *J. Nutr. Sci.*, 1 (2012) e2
- [42] L. Cedó, A. Castell-Auví, V. Pallarès, C.U. Mohien, I. Baiges, M. Blay, A. Ardévol, M. Pinent, Pancreatic islet proteome profile in Zucker fatty rats chronically treated with a grape seed procyanidin extract, *Food Chem.*, 135 (2012) 1948-56
- [43] P. Muthenna, G. Raghu, C. Akileshwari, S.N. Sinha, P. Suryanarayana, G.B. Reddy, Inhibition of protein glycation by procyanidin-B2 enriched fraction of cinnamon: Delay of diabetic cataract in rats, *IUBMB Life*, 65 (2013) 941-50
- [44] P. Muthenna, G. Raghu, P.A. Kumar, M.V. Surekha, G.B. Reddy, Effect of cinnamon and its procyanidin-B2 enriched fraction on diabetic nephropathy in rats, *Chem. Biol. Interact.*, 222 (2014) 68-76
- [45] C.G. Song, X. Yang, L.Q. Min, C.X. Liu, C.S. Zhao, The effect of procyanidin on expression of STAT1 in type 2 diabetes mellitus SD rats with focal cerebral ischemia, *Neuro Endocrinol. Lett.*, 35 (2014) 68-72
- [46] W. Yin, B. Li, X. Li, F. Yu, Q. Cai, Z. Zhang, M. Cheng, H. Gao, Anti-inflammatory effects of grape seed procyanidin B2 on a diabetic pancreas, *Food Funct.*, 6 (2015) 3065-71
- [47] L. Bao, X. Cai, Z. Zhang, Y. Li, Grape seed procyanidin B2 ameliorates mitochondrial dysfunction and inhibits apoptosis via the AMP-activated protein kinase-silent mating type information regulation 2 homologue 1-PPAR $\gamma$  co-activator-1 $\alpha$  axis in rat mesangial cells under high-dose glucosamine, *Br. J. Nutr.*, 113 (2015) 35-44
- [48] D. Li, T. Zhao, J. Meng, Y. Jing, F. Jia, P. He, Procyanidin B2 inhibits high glucose-induced epithelial-mesenchymal transition in HK-2 human renal proximal tubular epithelial cells, *Mol. Med. Rep.*, 12 (2015) 8148-54
- [49] A. Ahangarpour, G. Afshari, S.A. Mard, A. Khodadadi, M. Hashemitabar, Preventive effects of procyanidin A2 on glucose homeostasis, pancreatic and duodenal homeobox 1, and glucose transporter 2 gene expression disturbance induced by bisphenol A in male mice, *J. Physiol. Pharmacol.*, 67 (2016) 243-52
- [50] Y. Yamashita, L. Wang, F. Nanba, C. Ito, T. Toda, H. Ashida, Procyanidin promotes translocation of glucose transporter 4 in muscle of mice through activation of insulin and AMPK signaling pathways, *PLoS One*, 11 (2016) e0161704

## Supplementary Data

- [51] T. Tamura, M. Ozawa, S. Kobayashi, H. Watanabe, S. Arai, K. Mura, Inhibitory effect of oligomeric polyphenols from peanut-skin on sugar digestion enzymes and glucose transport, *Food Sci. Technol.*, 21 (2015) 111-5
- [52] L. Chen, L. Chen, T. Wang, P. Yuan, K. Chen, Q. Jia, H. Wang, Y. Li, Preparation of methylated products of A-type procyanidin trimers in cinnamon bark and their protective effects on pancreatic  $\beta$ -cell, *J. Food Sci.*, 81 (2016) C1062-9
- [53] P. Sun, T. Wang, L. Chen, B.W. Yu, Q. Jia, K.X. Chen, H.M. Fan, Y.M. Li, H.Y. Wang, Trimer procyanidin oligomers contribute to the protective effects of cinnamon extracts on pancreatic  $\beta$ -cells in vitro, *Acta Pharmacol. Sin.*, 37 (2016) 1083
- [54] Y. Liu, W.J. Liao, Z. Zhu, H. Zeng, H.Q. He, X.L. Sun, X.F. Xu, L. Huang, W.M. Wang, X.Y. Zhou, et al., Effect of procyanidine on VEGFR-2 expression and transduction pathway in rat endothelial progenitor cells under high glucose conditions, *Genet. Mol. Res.*, 15 (2016) GMR.15016925
- [55] X. Cai, L. Bao, J. Ren, Y. Li, Z. Zhang, Grape seed procyanidin B2 protects podocytes from high glucose-induced mitochondrial dysfunction and apoptosis via the AMPK-SIRT1-PGC-1 $\alpha$  axis in vitro, *Food Funct.*, 7 (2016) 805-15
- [56] I. Rodríguez-Ramiro, S. Ramos, L. Bravo, L. Goya, M.Á. Martín, Procyanidin B2 induces Nrf2 translocation and glutathione S-transferase P1 expression via ERKs and p38-MAPK pathways and protect human colonic cells against oxidative stress, *Eur. J. Nutr.*, 51 (2012) 881-92
- [57] Q. Chen, R. Zhang, W.M. Li, Y.J. Niu, H.C. Guo, X.H. Liu, Y.C. Hou, L.J. Zhao, The protective effect of grape seed procyanidin extract against cadmium-induced renal oxidative damage in mice, *Environ. Toxicol. Pharmacol.*, 36 (2013) 759-68
- [58] D. Buonocore, A. Lazzaretti, P. Tocabens, V. Nobile, E. Cestone, G. Santin, M.G. Bottone, F. Marzatico, Resveratrol-procyanidin blend: nutraceutical and antiaging efficacy evaluated in a placebocontrolled, double-blind study, *Clin. Cosmet. Investig. Dermatol.*, 5 (2012) 159-65
- [59] E.B. Byun, T. Ishikawa, A. Suyama, M. Kono, S. Nakashima, T. Kanda, T. Miyamoto, T. Matsui, A procyanidin trimer, C1, promotes NO production in rat aortic endothelial cells via both hyperpolarization and PI3K/Akt pathways, *Eur. J. Pharmacol.*, 692 (2012) 52-60
- [60] B.Y. Yang, X.Y. Zhang, S.W. Guan, Z.C. Hua, Protective effect of procyanidin B2 against CCl<sub>4</sub>-induced acute liver injury in mice, *Molecules*, 20 (2015) 12250-65
- [61] J.Q. Zhang, B.W. Gao, J. Wang, Q.L. Ren, J.F. Chen, Q. Ma, Z.J. Zhang, B.S. Xing, Critical role of FoxO1 in granulosa cell apoptosis caused by oxidative stress and protective effects of grape seed procyanidin B2, *Oxid. Med. Cell Longev.*, (2016) 6147345
- [62] Q.J. Wu, Y.Q. Wang, Y.X. Qi, The protective effect of procyanidin against LPS-induced acute gut injury by the regulations of oxidative state, *Springerplus*, 5 (2016) 1645
- [63] M. Mizuno, I. Nakanishi, S. Matsubayashi, K. Imai, T. Arai, K.I. Matsumoto, K. Fukuhara, Synthesis and antioxidant activity of a procyanidin B3 analogue, *Bioorg. Med. Chem. Lett.*, 27 (2017) 1041-4
- [64] Y. Kim, Y. Choi, H. Ham, H.S. Jeong, J. Lee, Protective effects of oligomeric and polymeric procyanidin fractions from defatted grape seeds on tert-butyl hydroperoxide-induced oxidative damage in HepG2 cells, *Food Chem.*, 137 (2013) 136-41
- [65] V. Pallarès, A. Fernández-Iglesias, L. Cedó, A. Castell-Auví, M. Pinent, A. Ardévol, M.J. Salvadó, S. Garcia-Vallvé, M. Blay, Grape seed procyanidin extract reduces the endotoxic effects induced by lipopolysaccharide in rats, *Free Radic. Biol. Med.*, 60 (2013) 107-14
- [66] E.B. Byun, N.Y. Sung, E.H. Byun, D.S. Song, J.K. Kim, J.H. Park, B.S. Song, S.H. Park, J.W. Lee, M.W. Byun, et al., The procyanidin trimer C1 inhibits LPS-induced MAPK and NF- $\kappa$ B signaling through TLR4 in macrophages, *Int. Immunopharmacol.*, 15 (2013) 450-6
- [67] N.Y. Sung, M.S. Yang, D.S. Song, J.K. Kim, J.H. Park, B.S. Song, S.H. Park, J.W. Lee, H.J. Park, J.H. Kim, et al., Procyanidin dimer B2-mediated IRAK-M induction negatively regulates TLR4 signaling in macrophages, *Biochem. Biophys. Res. Commun.*, 438 (2013) 122-8
- [68] N.Y. Sung, M.S. Yang, D.S. Song, E.B. Byun, J.K. Kim, J.H. Park, B.S. Song, J.W. Lee, S.H. Park, H.J. Park, et al., The procyanidin trimer C1 induces macrophage activation via NF- $\kappa$ B and MAPK pathways, leading to Th1 polarization in murine splenocytes, *Eur. J. Pharmacol.*, 714 (2013) 218-28

## Supplementary Data

- [69] Y. Kim, Y. Choi, H. Ham, H.S. Jeong, J. Lee, Polymeric procyanidin fraction from defatted grape seeds protects HepG2 cells against oxidative stress by inducing phase II enzymes via Nrf2 activation, *Food Sci. Biotechnol.*, 22 (2013) 485-91
- [70] H. Yang, L. Xiao, Y. Yuan, X. Luo, M. Jiang, J. Ni, N. Wang, Procyanidin B2 inhibits NLRP3 inflammasome activation in human vascular endothelial cells, *Biochem. Pharmacol.*, 92 (2014) 599-606
- [71] J.C. Park, S.H. Lee, J.K. Hong, J.H. Cho, I.H. Kim, S.K. Park, Effect of dietary supplementation of procyanidin on growth performance and immune response in pigs, *Asian-Australas J. Anim. Sci.*, 27 (2014) 131
- [72] N. Martínez-Micaelo, N. González-Abuín, M. Pinent, A. Ardévol, M. Blay, Procyanidin B2 inhibits inflammasome-mediated IL-1 $\beta$  production in lipopolysaccharide-stimulated macrophages, *Mol. Nutr. Food Res.*, 59 (2015) 262-9
- [73] J. Xing, R. Li, N. Li, J. Zhang, Y. Li, P. Gong, D. Gao, H. Liu, Y. Zhang, Anti-inflammatory effect of procyanidin B1 on LPS-treated THP1 cells via interaction with the TLR4-MD-2 heterodimer and p38 MAPK and NF- $\kappa$ B signaling, *Mol. Cell Biochem.*, 407 (2015) 89-95
- [74] S.L. Coleman, R.D. Hurst, G.M. Sawyer, M.C. Kruger, The in vitro evaluation of isolated procyanidins as modulators of cytokine-induced eotaxin production in human alveolar epithelial cells. *J. Berry Res.*, 6 (2016) 115-24
- [75] H. Aini, H. Ochi, M. Iwata, A. Okawa, D. Koga, M. Okazaki, A. Sano, Y. Asou, Procyanidin B3 prevents articular cartilage degeneration and heterotopic cartilage formation in a mouse surgical osteoarthritis model, *PLoS One*, 7 (2012) e37728
- [76] H. Kanno, Z. Kawakami, M. Tabuchi, K. Mizoguchi, Y. Ikarashi, Y. Kase, Protective effects of glycycomarin and procyanidin B1, active components of traditional Japanese medicine yokukansan, on amyloid  $\beta$  oligomer-induced neuronal death, *J. Ethnopharmacol.*, 159 (2015) 122-8
- [77] S. Wu, Y. Yue, J. Li, Z. Li, X. Li, Y. Niu, J. Xiang, H. Ding, Procyanidin B2 attenuates neurological deficits and blood-brain barrier disruption in a rat model of cerebral ischemia, *Mol. Nutr. Food Res.*, 59 (2015) 1930-41
- [78] R. Kujawski, M. Kujawska, M. Ożarowski, J. Baraniak, H. Laskowska, T. Nowocień, M. Borowska, M. Szulc, A. Sobczak, P. Mikołajczak, Perspectives for gallotannins neuroprotective potential-current experimental evidences, *Int. J. Med. Sci.*, 85 (2016) 317
